# Supplementary material
Source: publisher figshare collection journal article supplement (https://gsapubs.figshare.com/ndownloader/files/22758590)
Supplement: Supplementary file 1 [file 22758590]

## Data Repository Item

# Thermodynamic model and properties for the Au-Bi melt under hydrothermal conditions

### ***Introduction***

Few readily available computer packages are able to combine non-ideal melts with complex electrolyte solutions, reflecting the current paradigm that “melts and hydrothermal fluids don’t mix”. One exception is the *HydroChemistry* code (HCh; Shvarov and Bastrakov, 1999), which enables calculation of equilibria among minerals (including solid solutions), melts or non-electrolyte solutions (ideal or Non-Random Two-Liquid solution model; NRTL; Renon, 1968), electrolyte solutions, and gases (ideal or non-ideal).

The Au-Bi binary system contains three minerals (bismuth, gold, and maldonite;  $\text{Au}_2\text{Bi}$  - e.g. Chevalier, 1988; Okamoto and Massalski, 1983). We describe hereafter how we performed a new evaluation to obtain a self-consistent model in HCh. The HCh model appropriately reproduces the important features of the phase diagram over the range 25°C to 450°C (Fig. DR1, Table DR1).

- 22 *Figure DR1. Topology of the Au-Bi binary phase diagram (at 1 bar), calculated using*  
23 *the model developed in HCh. The experimental data from Nathans and Leider (1962)*  
24 *are shown as circles.*

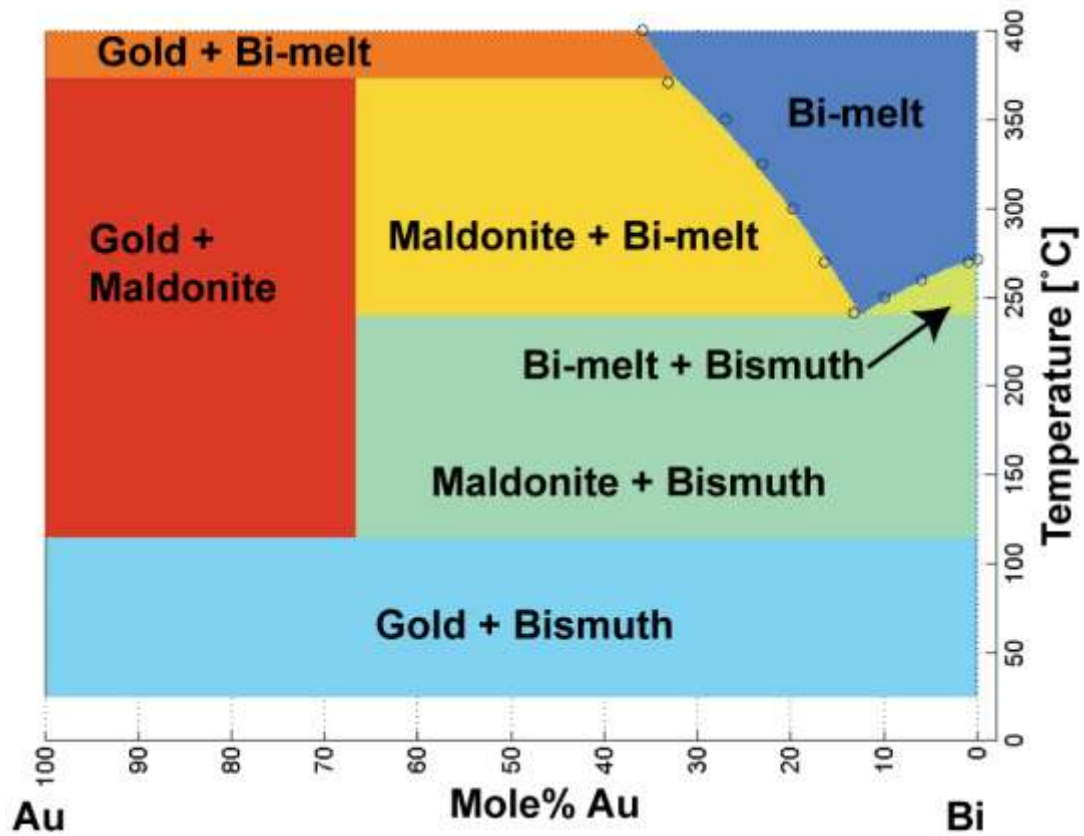

- 27 *Table DR1. Experimental and calculated values for points of interest in the Au-Bi*  
 28 *binary phase diagram.*

|                                                          | HCh model                        | Other Calc. and<br>Exptl. Values          | References                      |
|----------------------------------------------------------|----------------------------------|-------------------------------------------|---------------------------------|
| Bi melting                                               | 271.37°C                         | 271.37°C                                  | Okamoto and Massalski<br>(1983) |
| Au melting                                               | 1064.4°C                         | 1064.4°C                                  | Okamoto and Massalski<br>(1983) |
| Eutectic                                                 | 240.1°C, $x_{\text{Bi}} = 0.875$ | 241.25°C, $x_{\text{Bi}} \sim 0.86$       | Vogel (1906)                    |
|                                                          |                                  | 240°C, $x_{\text{Bi}} = 0.8236$           | Hajicek (1948)                  |
|                                                          |                                  | 241.10°C,<br>$x_{\text{Bi}} = 0.868(3)$   | Nathan and Leider (1996)        |
|                                                          |                                  | 241°C, $x_{\text{Bi}} = 0.85$             | Gather and Blachnik (1975)      |
|                                                          |                                  | 240.8(4)°C,<br>$x_{\text{Bi}} = 0.864(2)$ | Evans and Prince (1983)         |
| Peritectic                                               | 373.3°C, $x_{\text{Bi}} = 0.676$ | 371°C, $x_{\text{Bi}} = 0.669(3)$         | Nathan and Leider (1996)        |
|                                                          |                                  | 373, $x_{\text{Bi}} = 0.68$               | Gather and Blachnik (1975)      |
|                                                          |                                  | 378, $x_{\text{Bi}} = 0.666(3)$           | Evans and Prince (1983)         |
|                                                          |                                  | 373, $x_{\text{Bi}}$ not reported         | Jurriaanse (1935)               |
| $\text{Au}_2\text{Bi(s)} = 2\text{Au(s)} + \text{Bi(s)}$ | 114.3°C                          | ~116°C                                    | Okamoto and Massalski<br>(1983) |

29

### 30 ***The HCh model***

- 31 The HydroChemistry package (HCh) solves equilibria among pure minerals, solid  
 32 solutions, aqueous fluids, melts and gases using the Gibbs Free Energy Minimization  
 33 method (Shvarov and Bastrakov, 1999). Consequently, the Gibbs Free Energy of each

phase and aqueous species in the system must be available over the P-T range of interest.

The following standard state conventions apply in HCh (Shvarov and Bastrakov, 1999):

- Stoichiometric minerals or pure liquids/melts (including water): unit activity of the pure component at all temperatures and pressures.
- Gases (including stable and metastable steam): the hypothetical state of unit fugacity (1 bar) at any temperature.
- Aqueous species (other than H<sub>2</sub>O): unit activity of the species in a hypothetical 1 molal solution referenced to infinite dilution at any temperature and pressure.

The model and thermodynamic properties for Bi minerals, melt and aqueous species developed in HCh was transferred to the Geochemist's Workbench (Bethke, 1996), to draw activity-activity diagrams. This was accomplished using the UT2K and K2GWB utilities, and changing the P-T grid in GWB as outlined by Cleverley and Bastrakov (2005). GWB calculates equilibrium among pure minerals, aqueous solutions and gases by solving a system of mass balance and mass action equations, and does not allow consideration of non-ideal melts of mixed composition or solid solutions, therefore it is useful for descriptions of speciation trends but HCh is required for modelling reactions involving the Bi (+/- Au) melt.

### **Gibbs free energy for pure melts & minerals:**

The Gibbs free energy of formation from the elements ( $\Delta_f G^0(T, P)$ ) of minerals and melts at any pressure and temperature (T, P) is calculated relative to the Gibbs free

59 energy of formation at the reference conditions,  $T_r = 25^\circ\text{C}$ ,  $P_r = 1$  bar, using the  
60 following equation:

61

$$\begin{aligned} \Delta_f G^0(T, P) = & \Delta_f G^0(T_r, P_r) - S^0(T_r, P_r) \cdot (T - T_r) \\ & + \int_{T_r}^T C_p(t) dt - T \cdot \int_{T_r}^T \frac{C_p(t)}{t} dt + \int_{P_r}^P V(T, p) dP, \end{aligned} \quad (1)$$

63

64 where  $S^0(T_r)$ ,  $V(T_r)$  and  $\Delta_f G^0$  are the standard molal entropy, volume and Gibbs free  
65 energy of formation, and  $C_p(t)$  is the molal isobaric heat capacity of the mineral at  
66 1 bar, defined as a power function.

67

68 The properties for Au(s), Bi(s), Au(l) and Bi(l) are regressed from the data listed in  
69 Barin (1989; Table DR2). For maldonite, the heat capacity ( $c_p$ ) expression determined  
70 by Wallbrecht et al. (1981) was used, and the standard molal entropy and Gibbs free  
71 energy of formation for this mineral were adjusted in order to reflect the breakdown  
72 of maldonite into Au(s) + Bi(s) below around  $\sim 389$  K and the peritectic at  $\sim 374^\circ\text{C}$   
73 (Table DR1).

74

75 *Table DR2. Thermodynamic properties for minerals and pure melts in the HCh model*  
 76 *for the Au-Bi binary.*

| Phase                              | Gold(s)                                                                                                                             | Gold(l)      | Bismuth(s)                                                 | Bismuth(l)                                                                                                                  | Maldonite                                                                                                   |
|------------------------------------|-------------------------------------------------------------------------------------------------------------------------------------|--------------|------------------------------------------------------------|-----------------------------------------------------------------------------------------------------------------------------|-------------------------------------------------------------------------------------------------------------|
| $\Delta_f G_{P_r, T_r}^0$ [J/mole] | 0                                                                                                                                   | 32317        | 0                                                          | 8141                                                                                                                        | 4878                                                                                                        |
| $S_{P_r, T_r}^0$ [J/mole*K]        | 47.497                                                                                                                              | 73.270       | 56.735                                                     | 86.670                                                                                                                      | 213.199                                                                                                     |
| $V_{P_r, T_r}^0$ [J/bar]           | 1.0215                                                                                                                              | 0.900        | 2.131                                                      | 2.060                                                                                                                       | 3.840                                                                                                       |
| Cp expression<br>[J/mol/K]         | 128.143-<br>7.714547 $10^{-2}$ T+<br>1530557 T <sup>-2</sup> –<br>1721.841 T <sup>-0.5</sup> +<br>3.041287 $10^{-5}$ T <sup>2</sup> | 30.962       | 11.854 +<br>3.06 $10^{-2}$ T +<br>410183.5 T <sup>-2</sup> | -25.797+<br>3.00 $10^{-2}$ T<br>+ 0.8976 T <sup>-2</sup> +<br>985.9979 T <sup>-0.5</sup> –<br>7.90 $10^{-6}$ T <sup>2</sup> | 24.5 +<br>6.25 $10^{-3}$ T –<br>3.0105 $10^4$ T <sup>-2</sup>                                               |
| Reference                          | Barin (1989)                                                                                                                        | Barin (1989) | Barin (1989)                                               | Barin (1989)                                                                                                                | Cp from<br>Wallbrecht et<br>al. (1981);<br>$\Delta_f G_{P_r, T_r}^0$ and<br>$S_{P_r, T_r}^0$ this<br>study. |

77

78 The chosen properties for the minerals bismuthinite and bismite are listed in  
 79 Table DR3. The entropy of and free energy of bismuthinite were taken from Barin,  
 80 1989. There is a large uncertainty about the heat capacity and enthalpy of  
 81 bismuthinite, with different values being reported by Mills (1974) and Pankratz et al.  
 82 (1987). Barin (1989) choose enthalpy and entropy values similar to those in Mills  
 83 (1974), but the heat capacity expression given by Pankratz et al. (1987). We chose to  
 84 retain Mills (1974) heat capacity values, because the values proposed by Pankratz et  
 85 al. (1987) result in the prediction of extremely high stability of bismuthinite versus  
 86 native bismuth or bismuth melt over the conditions of interest in the present study.

87 Such a high stability is not consistent with the observation of native bismuth as a  
88 common mineral in many ore deposits.

89

90 *Table DR3. Thermodynamic properties for bismuthinite and bismite.*

| Phase                              | Bismuthinite             | Bismite                  |
|------------------------------------|--------------------------|--------------------------|
| $\Delta_f G_{P_r, T_r}^0$ [J/mole] | -140347                  | -485912                  |
| $S_{P_r, T_r}^0$ [J/mole*K]        | 200.40                   | 116.461                  |
| $V_{P_r, T_r}^0$ [J/bar]           | 7.552                    | 4.973                    |
| Cp expression                      | 114.5508+                | 103.5122+                |
| [J/mol/K]                          | $2.7717 \cdot 10^{-2} T$ | $3.3472 \cdot 10^{-2} T$ |

91

92 The model also includes the mineral bismite ( $\text{Bi}_2\text{O}_3$ ). This mineral is known mainly as  
93 a weathering product of Bi-rich ores, but does not form under conditions typical of  
94 most hydrothermal ore deposits. Bismite is added for completeness and for allowing  
95 comparison with the  $\alpha$ - $\text{Bi}_2\text{O}_3$  solubility experiments of Kolonin and Laptev (1982).  
96 The heat capacity (Table DR3) is taken from Naumov et al. (1974). The Gibbs free  
97 energy and entropy listed by Naumov et al. (1974) were adjusted to reproduce the  
98 solubility data from Kolonin and Laptev (1982) (Log K1 in Table DR4):  $\Delta_f G_{P_r, T_r}^0$  was  
99 adjusted from -493.712 kJ/mole to -485.912 kJ/mole, and  $S_{P_r, T_r}^0$  from 151.46 J/mole/K  
100 to 116.461 J/mole/K. The molar volume data for all solids are from Robie and  
101 Hemingway (1995).

102

103 ***Au-Bi Melt***

104 The non-ideality of the Au-Bi melt was described using the non-random two-liquid  
105 solution model implemented in HCh (NRTL; Renon, 1968). The chemical potential of  
106 the melt,  $\mu_{melt, NRTL}^0$ , is described by the following expression:

$$108 \quad \mu_{melt, NRTL}^0 = x_{Bi(l)} \left( \mu_{Bi(l)}^0 + RT (\ln \gamma_{Bi(l)} + \ln x_{Bi(l)}) \right) + x_{Au(l)} \left( \mu_{Au(l)}^0 + RT (\ln \gamma_{Au(l)} + \ln x_{Au(l)}) \right) \quad (2)$$

109  
110 where  $\mu_{Au(l)}^0$  and  $\mu_{Bi(l)}^0$  are the molal chemical potential for the pure melts,  $x_{Au(l)}$  and  
111  $x_{Bi(l)}$  are the mole fractions of Au and Bi in the melt, respectively, and  $\gamma_{Au(l)}$  and  $\gamma_{Bi(l)}$   
112 are the activity coefficients for Au and Bi in the melt.

113  
114 The NRTL model describes the non-ideality of the Au-Bi melt using three empirical  
115 parameters,  $\alpha_{12}$ ,  $\tau_{12}$ ,  $\tau_{21}$ ; index 1 corresponds to Bi(l), and 2 to Au(l). The NRTL  
116 equations are as follow:

$$118 \quad G_{12} = \exp(-\alpha_{12} \tau_{12}) \quad (3)$$

$$119 \quad G_{21} = \exp(-\alpha_{12} \tau_{21}) \quad (4)$$

$$120 \quad \alpha_{12} = \alpha_{21} \quad (5)$$

$$122 \quad \ln(\gamma_{Bi(l)}) = x_{Au(l)}^2 \left( \frac{\tau_{21} G_{21}^2}{(x_{Bi(l)} + x_{Au(l)} G_{21})^2} + \frac{\tau_{12} G_{12}}{(x_{Au(l)} + x_{Bi(l)} G_{12})^2} \right) \quad (6)$$

$$124 \quad \text{and } \ln(\gamma_{Au(l)}) = x_{Bi(l)}^2 \left( \frac{\tau_{12} G_{12}^2}{(x_{Au(l)} + x_{Bi(l)} G_{12})^2} + \frac{\tau_{21} G_{21}}{(x_{Bi(l)} + x_{Au(l)} G_{21})^2} \right) \quad (7)$$



125

126 Non-linear least-square fitting was used to optimise the NRTL parameters in order to  
 127 reproduce the data of Nathans and Leider (1962) concerning the composition of the  
 128 liquidus. As noted by Okamoto and Massalski (1983), the Nathans and Leider (1962)  
 129 data is preferred over those of Vogel (1906) because the presence of the Au<sub>2</sub>Bi  
 130 intermediate was not observed in the latter study, and the melting point of bismuth  
 131 was reported about 5°C lower than the accepted value. The resulting NRTL  
 132 parameters are:

133

$$134 \quad \alpha_{12} = 0.5547, \quad \tau_{12} = -2.7352, \quad \tau_{21} = -1.6006 \quad (8)$$

135

### 136 ***Aqueous species for bismuth and gold***

137 In HCh, properties for aqueous species can be introduced using the revised Helgeson-  
 138 Kirkham-Flowers equations of state (HKF) (Shock et al., 1992; Tanger and Helgeson,  
 139 1988). Alternatively, the Gibbs free energies of aqueous complexes can be calculated  
 140 according to the modified Ryzhenko-Bryzgalin model (MRB) (Borisov and Shvarov,  
 141 1992) from their  $pK_{diss}(T,P)$  values:

142

$$143 \quad \Delta G(T,P) = \sum n_i \cdot \Delta G_i(T,P) - R \cdot T \cdot \ln(10) \cdot pK_{diss}(T,P), \quad (9)$$

144

145 where  $\Delta G_i(T,P)$  are Gibbs free energies of “basic” species described using the HKF  
 146 model, and  $n_i$  are stoichiometric coefficients. The temperature and pressure  
 147 dependence of  $pK_{diss}(T,P)$  values is represented by the equation:

148

$$pK_{diss}(T, P) = \frac{T_r}{T} \cdot pK_{diss}(T_r, P_r) + B(T, P) \cdot (zz/a)_{eff}, \quad (10)$$

150

151 where  $(zz/a)_{eff}$  is the effective property of the complex which depends on temperature:

152

$$(zz/a)_{eff} = A + \frac{B}{T}. \quad (11)$$

154

155 The parameter  $B(T, P)$  does not depend on the complex type and is computed from the

156 dissociation constant of water according to Marshall and Franck (1981). For  $H_2O$

157  $(zz/a)_{eff} = 1.0107$ .

158

159 The aqueous speciation model for bismuth and gold was built into the HCh

160 framework using broadly the same principles as those used by Skirrow and Walshe

161 (2002) in their study of the Tennant Creek deposits. The properties for most Bi

162 aqueous species are derived from the experimental study of Kolonin and Laptev

163 (1982) (solubility and UV-Vis spectrophotometry) of Bi speciation under

164 hydrothermal conditions:

165

166 •  $Bi^{3+}$  was selected as a basis species, with HKF parameters from Shock et al.  
167 (1997).

168 • HKF parameters for  $Bi(OH)^{2+}$  and  $Bi(OH)_4^-$  are from Shock et al. (1997).

169 • MRB parameters were regressed for  $Bi(OH)_3(aq)$ ,  $Bi(OH)_2^+$ ,  $BiCl_n^{3-n}$  ( $n=1-6$ ),

170  $Bi(OH)Cl_2(aq)$  and  $Bi(OH)_2Cl(aq)$  using association constants listed in

171 Kolonin and Laptev (1982) (see Table DR4).

172       • Properties for  $\text{Bi}_2\text{S}_2(\text{OH})_2(\text{aq})$ ,  $\text{HBi}_2\text{S}_4^-$  and  $\text{H}_2\text{Bi}_2\text{S}_4$  were generated by  
173       comparison with As and Sb complexes of similar stoichiometry (see Skirrow  
174       and Walshe, 2002).

175       The HKF properties for Au species ( $\text{AuHS}_{(\text{aq})}$ ,  $\text{Au}(\text{HS})_2^-$ ,  $\text{Au}(\text{OH})_2^-$ ,  $\text{AuCl}_2^-$ ) are  
176       from Bastrokov (2000), for  $\text{AuCl}_{(\text{aq})}$  and  $\text{Au}(\text{OH})_{(\text{aq})}$  from Akinfiev and Zotov  
177       (2001). The thermodynamic properties for all other aqueous species are from the  
178       default HCh-UT database (Shvarov and Bastrakov 1999).

179

180

181 *Table DR4. Thermodynamic properties for Bi-OH and Bi-Cl complexes from Kolonin*  
 182 *and Laptev (1982).*

|                                                                                                                                          | 25    | 75    | 200   | 300   | Source*/note                                       |
|------------------------------------------------------------------------------------------------------------------------------------------|-------|-------|-------|-------|----------------------------------------------------|
| Solubility data:<br><br>0.5 Bi <sub>2</sub> O <sub>3</sub> + 1.5 H <sub>2</sub> O = Bi(OH) <sub>3</sub> (aq)                             | -6.06 | -5.07 | -3.50 | -2.74 | Tab. 1.                                            |
| $\text{Log } \beta_3 = \frac{[\text{Bi}(\text{OH})_3^0]}{[\text{Bi}^{3+}][\text{OH}^-]^3}$<br><br>or<br><br>33.2                         | 32.94 | 31.38 | 31.36 | 33.15 | Tab. 1. The<br>bridge to the<br>'basis' in<br>HCh. |
| $\text{Log } \beta_2 = \frac{[\text{Bi}(\text{OH})_2^+]}{[\text{Bi}^{3+}][\text{OH}^-]^2}$                                               | 25.5  | 24.18 | 23.4  | 24.3  | Tab. 1.                                            |
| $\text{Log } \beta_1^{\text{Cl}} = \frac{[\text{BiCl}^{2+}]}{[\text{Bi}^{3+}][\text{Cl}^-]}$                                             | 2.2   |       | 3.7   | 5.7   | Tab. 4.                                            |
| $\text{Log } \beta_2^{\text{Cl}} = \frac{[\text{BiCl}_2^+]}{[\text{Bi}^{3+}][\text{Cl}^-]^2}$                                            | 3.5   |       | 4.9   | 7.2   | Tab. 4.                                            |
| $\text{Log } \beta_3^{\text{Cl}} = \frac{[\text{BiCl}_3^0]}{[\text{Bi}^{3+}][\text{Cl}^-]^3}$                                            | 5.8   |       | 6.9   | 9.3   | Tab. 4.                                            |
| $\text{Log } \beta_4^{\text{Cl}} = \frac{[\text{BiCl}_4^-]}{[\text{Bi}^{3+}][\text{Cl}^-]^4}$                                            | 6.75  |       | 7.8   | 10.5  | Tab. 4.                                            |
| $\text{Log } \beta_5^{\text{Cl}} = \frac{[\text{BiCl}_5^{2-}]}{[\text{Bi}^{3+}][\text{Cl}^-]^5}$                                         | 7.3   |       | 8.5   | 11.6  | Tab. 4.                                            |
| $\text{Log } \beta_6^{\text{Cl}} = \frac{[\text{BiCl}_6^{3-}]}{[\text{Bi}^{3+}][\text{Cl}^-]^6}$                                         | 7.36  |       | 9.0   | 12.4  | Tab. 4.                                            |
| $\text{Log } \beta_{1,2}^{\text{OH},\text{Cl}} = \frac{[\text{Bi}(\text{OH})\text{Cl}_2^0]}{[\text{Bi}^{3+}][\text{OH}][\text{Cl}^-]^2}$ | 16.0  |       | 16.0  | 18.2  | Tab. 4.                                            |
| $\text{Log } \beta_{2,1}^{\text{OH},\text{Cl}} = \frac{[\text{Bi}(\text{OH})_2\text{Cl}^0]}{[\text{Bi}^{3+}][\text{OH}]^2[\text{Cl}^-]}$ | 25.0  |       | 25.2  | 26.2  | Tab. 4.                                            |

183 \* Tables in Kolonin and Laptev (1981)

184

## 185 **References**

186 Akinfiev, N. N. and Zotov, A. V. (2001) Thermodynamic description of chloride,

187 hydrosulfide, and hydroxo complexes of Ag(I), Cu(I), and Au(I) at

188 temperatures of 25-500 °C and pressures of 1-2000 bar. *Geochemistry*

189 *International* **39**, 990-1006.

190 Barin, I., 1989, Thermochemical Data of Pure Substances, VCH Verlagsgesellschaft,

191 Weinheim.

192 Bastrakov, E. N. (2000) Gold Metallogensis at the Lake Cowal Prospect, NSW. PhD

193 dissertation, The Australian National University, 114 pp.

194 Bethke, C.M., 1996, Geochemical reaction modeling, concepts and applications: New

195 York, Oxford University Press, 397 p. p.

196 Borisov, M. V., and Shvarov, Y. V., 1992, Thermodynamics of geochemical

197 processes: Moscow, Moscow State University Publishing House, 254 p (in

198 Russian).

199 Chevalier, P.-Y., 1988, Thermodynamic evaluation of the Au-Bi system:

200 *Thermochimica Acta*, v. 130, p. 15-24.

201 Cleverley, J.S. and Bastrakov, E.N., 2005, K2GWB: Utility for generating

202 thermodynamic data files for The Geochemist's Workbench® at 0-1000oC and

203 1-5000 bar from UT2K and the UNITHERM database: *Computers and*

204 *Geosciences*, v. 31, p. 756-767

205 Evans, D.S., and Prince, A., 1983, Private communication, reported by Chevalier

206 1987.

- 207 Gather, B., and Blachnik, Z., 1975, Ternary Chalcogenide-containing Systems II.  
208 Gold-Bismuth-Selenium System: Metallkd., 66, p. 356.
- 209 Hajicek, O., 1948, Simple Binary Alloys Containing a Eutectic: Hutn. Listy, 3, p. 265.
- 210 Jurriaanse, T., 1935, The Crystal Structure of  $\text{Au}_2\text{Bi}$ : Z. Kristallogr., Kristall  
211 Geometry, Kristallphysic, Kristallchemie, v. 90, p. 322.
- 212 Kolonin G.R and Laptev Y.V., (1982), Study of process of dissolution of  $\alpha\text{-Bi}_2\text{O}_3$   
213 (bismite) and complex formation of bismuth in hydrothermal solutions,  
214 *Geokhimiya*, V. 11, p1621-1631.
- 215 Marshall, W. L., and Franck, E. U., 1981, Ion product of water substance, 0-1000°C,  
216 1-10000 bars new international formulation and its background: Journal of  
217 Physical And Chemical Reference Data, v. 10, 2, p. 295-304.
- 218 Mills, K.C., 1974: Thermodynamic data for inorganic sulphides, selenides, and  
219 tellurides: London, Butterworths, 845 pp.
- 220 Nathans, M.W. and Leider, M., 1962, Studies on bismuth alloys. I. Liquidus curves of  
221 the bismuth-copper, bismuth-silver, and bismuth-gold systems: J. Phys.  
222 Chem., 66, p. 2012-215.
- 223 Naumov, G.B., Kyzhenko, B.N., and Khodakovsky, I.L., 1974, Handbook of  
224 thermodynamic data (translated from Russian): NTIS Publication PB226-722.
- 225 Okamoto, H., Massalski, T.B., 1983, Au-Bi (Gold-Bismuth): Bull. Alloy Phase  
226 Diagrams: 4, p. 238-240.
- 227 Pankratz, L.B., Mah, A.D. and Watson, S.W., 1987, Thermodynamic properties of  
228 sulfides: U.S. Bur. Mines. Bull. 674, 1-902.
- 229 Renon, H. and Prausnitz J.M., 1968, Local Compositions in Thermodynamic Excess  
230 Functions for Liquid Mixtures: AIChE Journal, v. 14, p. 135-144.

- 231 Robie R. A. and Hemingway B. S., 1995. Thermodynamic properties of minerals and  
232 related substances at 298.15 K and 1 bar (105 Pascals) pressure and at higher  
233 temperatures, pp. 461. U. S. Geological Survey.
- 234 Shvarov, Y. V., and Bastrakov, E., 1999, HCh: a software package for geochemical  
235 modelling. User's guide: AGSO record, v. 1999/25, p. 60 pp.
- 236 Shock, E.L., Oelkers, E.H., Johnson, J.W., Sverjensy, D.A., and Helgeson, H.C.,  
237 1992, Calculation of the thermodynamic properties of aqueous species at high  
238 pressures and temperatures. Effective electrostatic radii, dissociation constants  
239 and standard partial molal properties: J. Chem. Soc. Faraday Trans., v. 88, p.  
240 803-826.
- 241 Shock, E.L., Sassani, D.C., Willis, M., and Sverjensky, D.A., 1997, Inorganic species  
242 in geologic fluids - correlations among standard molal thermodynamic  
243 properties of aqueous ions and hydroxide complexes: *Geochimica et*  
244 *Cosmochimica Acta*, v. 61, p. 907-950.
- 245 Skirrow, R.G., and Walshe, J.L., 2002, Reduced and oxidized Au-Cu-Bi iron oxide  
246 deposits of the Tennant Creek inlier, Australia: An integrated geologic and  
247 chemical model: *Economic Geology And The Bulletin Of The Society Of*  
248 *Economic Geologists*, v. 97, p. 1167-1202.
- 249 Sudo, K., 1952, Smelting of sulfide ores. XII. The equilibrium in the reduction of  
250 solid bismuth trisulfide by hydrogen: *Research Inst. Mineral Dressing*  
251 *Metallurgy Bull.*, v8, 109-115 (cited in *Chem. Abs.*, v. 49, 6055d).
- 252 Tanger, J.C.I., and Helgeson, H.C., 1988, Calculation of the thermodynamic and  
253 transport properties of aqueous species at high pressures and temperatures:  
254 Revised equations of state for the standard partial molal properties of ions and  
255 electrolytes: *American Journal of Science*, v. 288, p. 19-98.

- 256 Vogel, R., 1906, Z. Anorg. Chem., v. 50, p. 145-157.
- 257 Wallbrecht, P.C., Blachnik, R., and Mills, K.C., 1981, The heat capacity and enthalpy
- 258 of some Hume-Rothery phases formed by copper, silver and gold. Part I.
- 259 Cu+Sb, Ag+Sb, Au+Sb, Au+Bi systems: Thermochemica Acta, v. 45, p. 189-
- 260 198.
- 261
